# Supplementary material for: A neuropeptide regulates fighting behavior in Drosophila melanogaster
Source: eLife. 2020 Apr 21;9:e54229. doi: 10.7554/eLife.54229 (PMC7173970; doi:10.7554/eLife.54229)
Supplement: Supplementary file 2. [file elife-54229-supp2.xls]

## Sheet: total
The number of labeled cells of mosaic flies
	type I	type II	type III
1	2	0	0
2	1	0	0
3	1	1	0
4	1	1	0
5	2	1	0
6	2	1	0
7	1	0	1
8	1	1	0
9	2	1	0
10	1	2	0
11	1	1	1
12	1	1	0
13	2	2	1
14	0	1	1
15	0	2	0
16	1	0	1
17	1	2	2
18	1	1	0
19	1	1	1
20	2	2	0
21	1	2	0
22	2	1	0
23	2	0	0
24	0	1	1
25	2	0	0
26	2	0	0
27	0	2	0
28	2	2	0
29	2	1	0
30	0	2	2
31	2	1	0
32	1	1	0
33	2	0	0
34	2	2	0
35	1	2	0
36	2	2	0
37	2	1	0
38	1	1	1
39	1	1	1
40	1	1	0
41	1	2	0
42	1	0	1
43	1	1	0
44	1	1	0
45	1	1	0
46	1	1	0
47	1	1	0
48	1	1	0
49	1	2	0
50	1	1	0
51	2	2	0
52	2	2	1
53	1	1	0
54	2	2	2
55	1	2	1
56	0	1	0
57	0	1	0
58	0	2	0
59	1	1	0
60	1	2	0
61	1	2	0
62	1	1	0
63	1	2	0
64	2	2	1
65	2	2	0
66	2	1	0
67	0	1	0
68	1	1	1
69	1	2	1
70	2	0	0
71	0	1	2
72	0	1	0
73	1	1	0
74	1	2	0
75	1	1	1
76	1	1	0
77	1	1	1
78	0	1	1
79	1	1	0
80	2	2	0
81	1	2	0
82	2	2	0
83	0	1	2
84	2	2	0
85	1	0	0
86	0	1	0
87	0	1	1
88	0	1	0
89	0	2	1
90	1	1	0
91	1	1	1
92	1	1	0
93	1	2	0
